# Supplementary material for: Pancreatic Mass Characterization Using IVIM-DKI MRI and Machine Learning-Based Multi-Parametric Texture Analysis
Source: MDPI journal article supplement (doi:10.3390/bioengineering10010083), 2023-01-08
Supplement: s1 [file s1]

## Supplementary materials

Table S1: Texture features extracted from Global, GLCM, GLRLM, and NGDZM.

| Model                                                                                       | Features extracted                                                                                                                                                                                                                                                                                                                                                                                                                                        |
|---------------------------------------------------------------------------------------------|-----------------------------------------------------------------------------------------------------------------------------------------------------------------------------------------------------------------------------------------------------------------------------------------------------------------------------------------------------------------------------------------------------------------------------------------------------------|
| <b>Global (f1 – f3)</b>                                                                     | Variance, skewness, kurtosis                                                                                                                                                                                                                                                                                                                                                                                                                              |
| <b>Gray–Level Co–occurrence Matrix, GLCM (f4 – f12)</b>                                     | Energy, Contrast, Entropy, Homogeneity, Correlation, Sum Average, Variance, Dissimilarity, and AutoCorrelation                                                                                                                                                                                                                                                                                                                                            |
| <b>Gray–Level Run–Length Matrix, GLRLM (f13 – f25)</b>                                      | Short runs emphasis (SRE), long runs emphasis (LRE), grey level nonuniformity (GLN), run–length nonuniformity (RLN), run percentage (RP), low grey level runs emphasis (LGRE), high grey level runs emphasis (HGRE), short–run low grey level emphasis (SRLGE), short–run high grey level emphasis (SRHGE), long–run low grey level emphasis (LRLGE), long–run high grey level emphasis (LRHGE), Gray–Level Variance (GLV), and Run length variance (RLV) |
| <b>Neighborhood Gray–Tone Difference Matrix (NGTDM) texture features, NGTDM (f26 – f30)</b> | Coarseness, Contrast, Busyness, Complexity, Strength                                                                                                                                                                                                                                                                                                                                                                                                      |

Table S2: Coefficient of variation (CV: standard deviation of ROI x 100/mean of ROI) of IVIM–DKI parameters estimated using standard and IDTV models in pancreatic masses.

| IVIM–DKI parameters                                                                                                                                                      | Standard model | IDTV model | P–value |
|--------------------------------------------------------------------------------------------------------------------------------------------------------------------------|----------------|------------|---------|
| <b>D</b>                                                                                                                                                                 | 48±13          | 32±8       | <0.001  |
| <b>D*</b>                                                                                                                                                                | 150±63         | 146±43     | 0.45    |
| <b>f</b>                                                                                                                                                                 | 85±25          | 64±17      | <0.001  |
| <b>k</b>                                                                                                                                                                 | 98±36          | 34±14      | <0.001  |
| <b>D: Diffusion coefficient; D*: Pseudo–diffusion coefficient; f: Perfusion fraction; k:Kurtosis; IVIM–DKI: Intravoxel Incoherent motion–diffusion kurtosis imaging;</b> |                |            |         |

Table S3: P-values obtained from Tukey–Kramer Multiple comparison test between ADC and IVIM–DKI parameters values estimated using IDTV model in pancreatic masses.

| DWI parameters | Pancreatic masses | pNET  | MFCP | SPEN |
|----------------|-------------------|-------|------|------|
| ADC            | PDAC              | 0.65  | 0.73 | 0.86 |
|                | pNET              | –     | 0.30 | 1    |
|                | MFCP              | –     | –    | 0.51 |
| D              | PDAC              | 0.14  | 0.98 | 0.93 |
|                | pNET              | –     | 0.27 | 0.88 |
|                | MFCP              | –     | –    | 0.88 |
| D*             | PDAC              | 0.053 | 0.73 | 1    |
|                | pNET              | –     | 0.84 | 0.45 |
|                | MFCP              | –     | –    | 0.90 |
| f              | PDAC              | 0.013 | 0.28 | 0.91 |
|                | pNET              | –     | 0.96 | 0.63 |
|                | MFCP              | –     | –    | 0.90 |
| k              | PDAC              | 0.19  | 0.95 | 0.76 |
|                | pNET              | –     | 0.25 | 0.99 |
|                | MFCP              | –     | –    | 0.65 |

ADC: Apparent diffusion coefficient; D: Diffusion coefficient; D\*: Pseudo-diffusion coefficient; DWI: Diffusion-weighted imaging; f: Perfusion fraction; k: kurtosis; PDAC: Pancreatic ductal adenocarcinoma; pNET: Pancreatic neuroendocrine tumor; MFCP: Mass-forming chronic pancreatitis; SPEN: Solid pseudopapillary epithelial neoplasm; D\*: Pseudo-diffusion coefficient; f: Perfusion fraction;

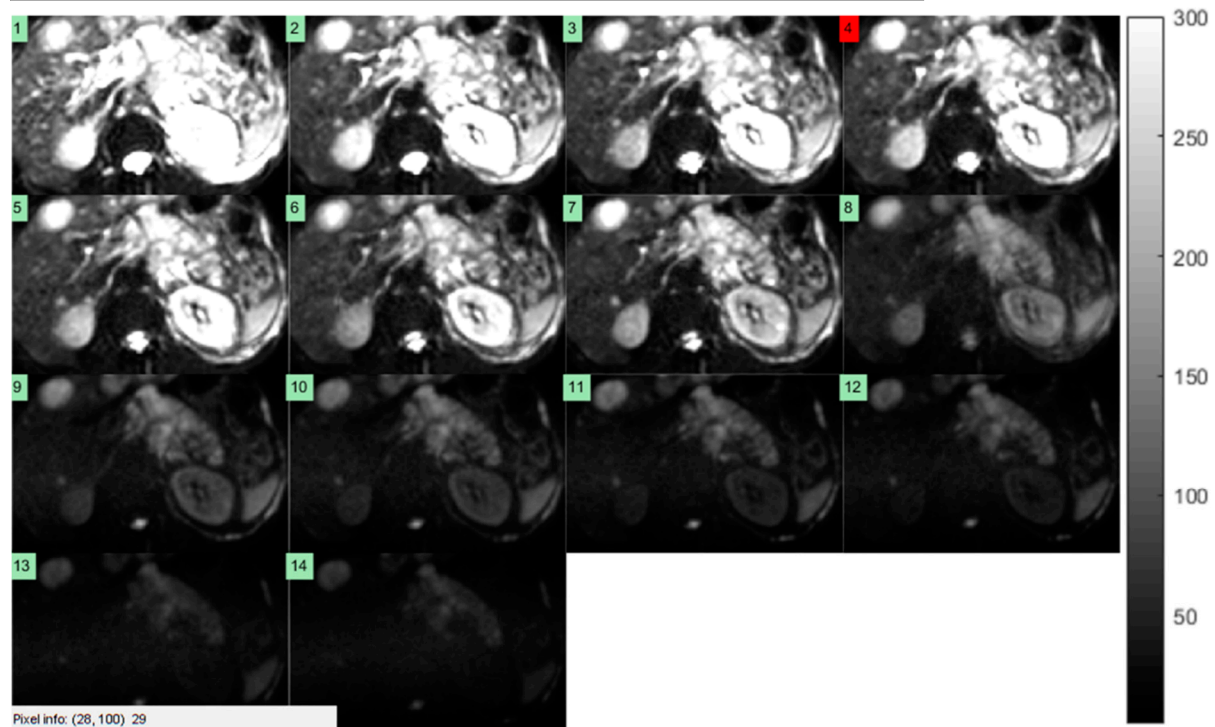

Figure S1: 1 to 14: DWI trace images of a representative patient from IVIM–DKI images at 14 b-values from 0 to 2500 s/mm<sup>2</sup> (0,25,50,75,100,150,200,500,800,1000,1250,1500,2000,2500 s/mm<sup>2</sup>).

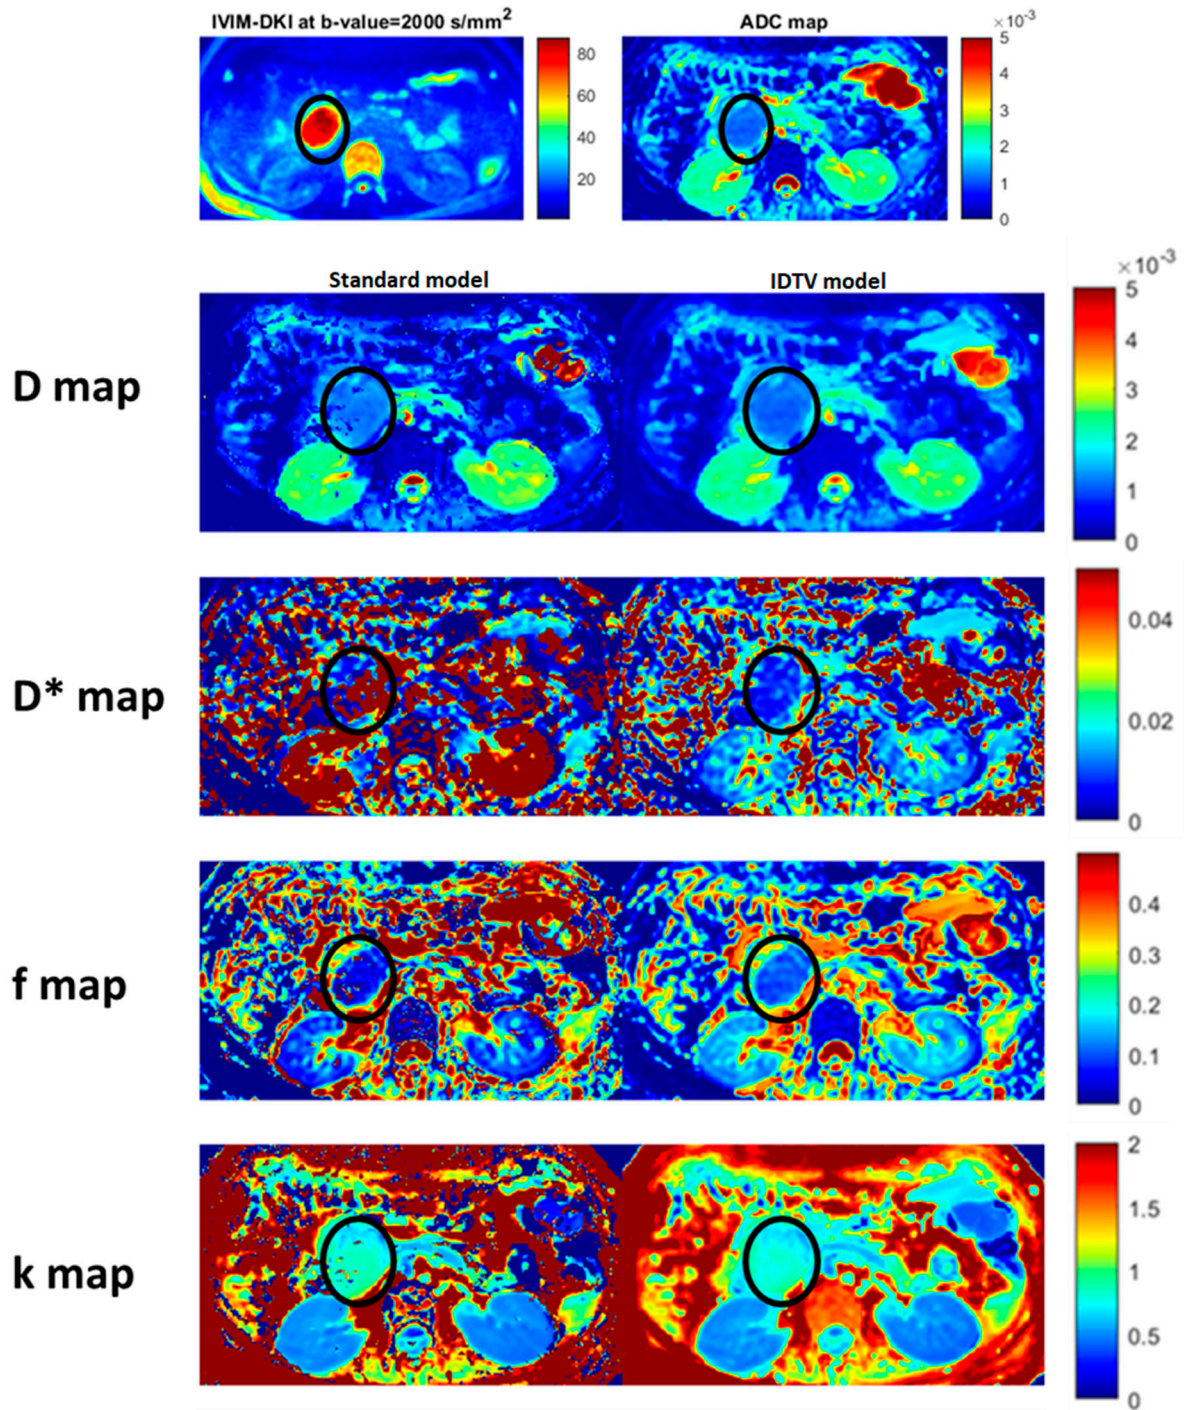

Figure S2: Representative image of a 28–years–old female patient with solid papillary epithelial neoplasm (SPEN); where qualitative comparison between parameter maps (D, D\*, f and k maps) estimated using standard and IDTV model.

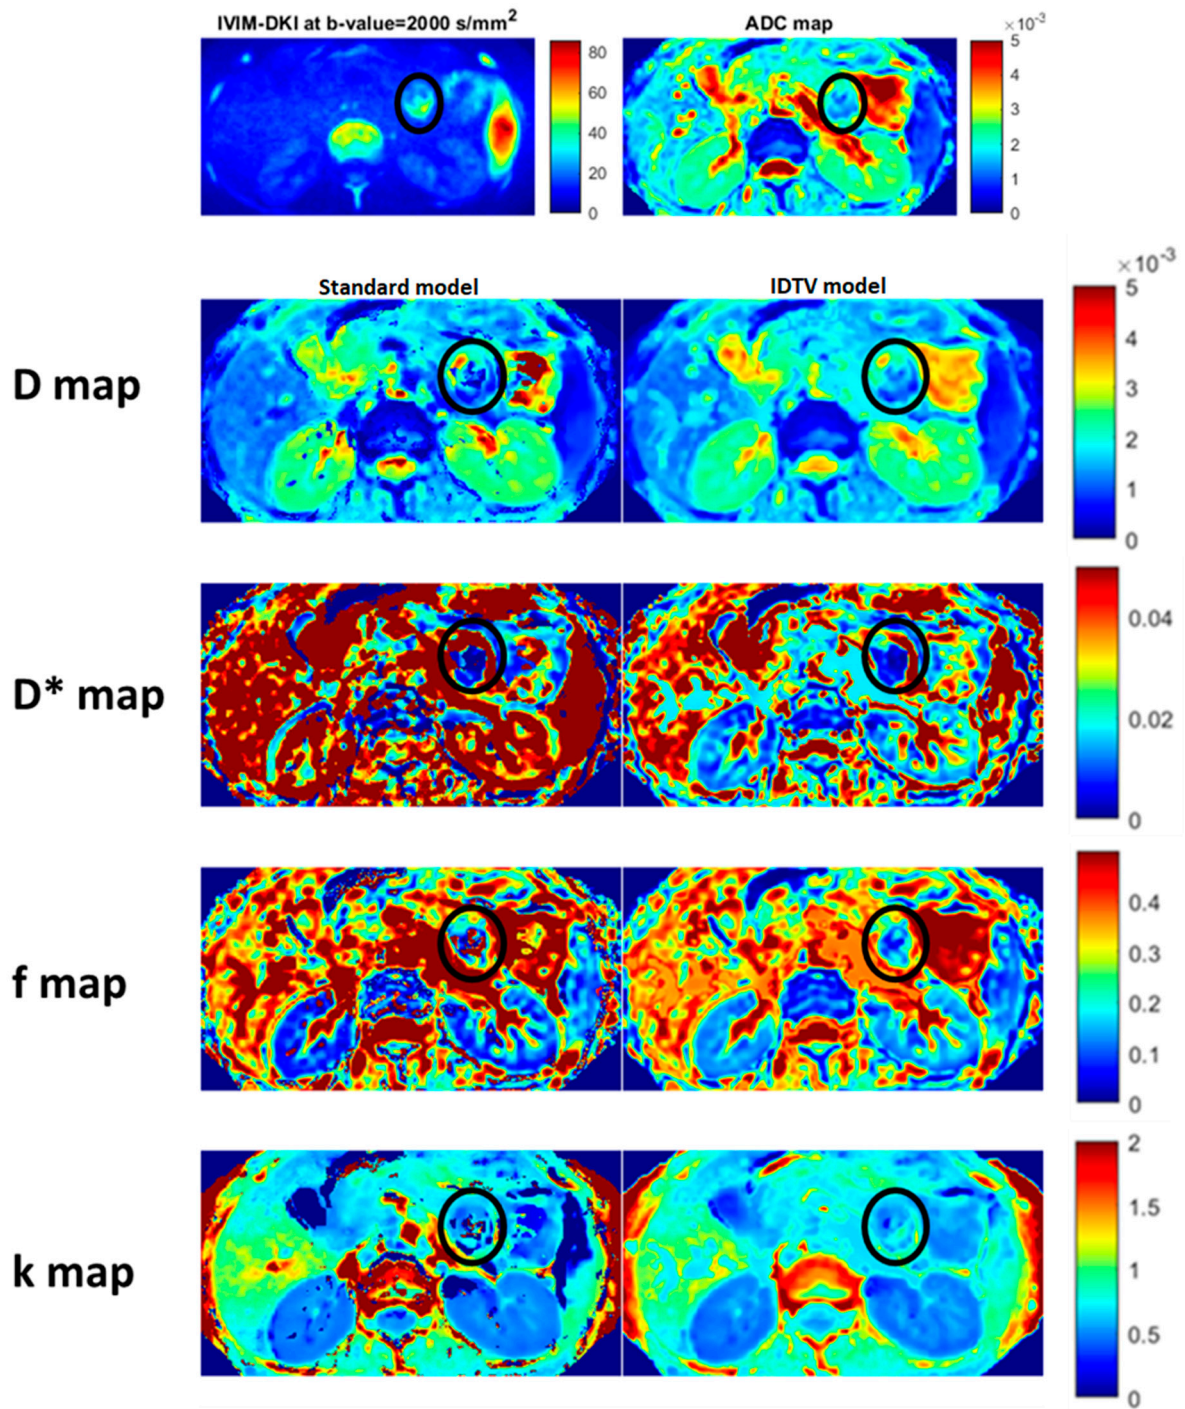

Figure S3: Representative image of a 26-years-old female patient with solid papillary epithelial neoplasm (SPEN); where qualitative comparison between parameter maps (D, D\*, f and k maps) estimated using standard and IDTV model.

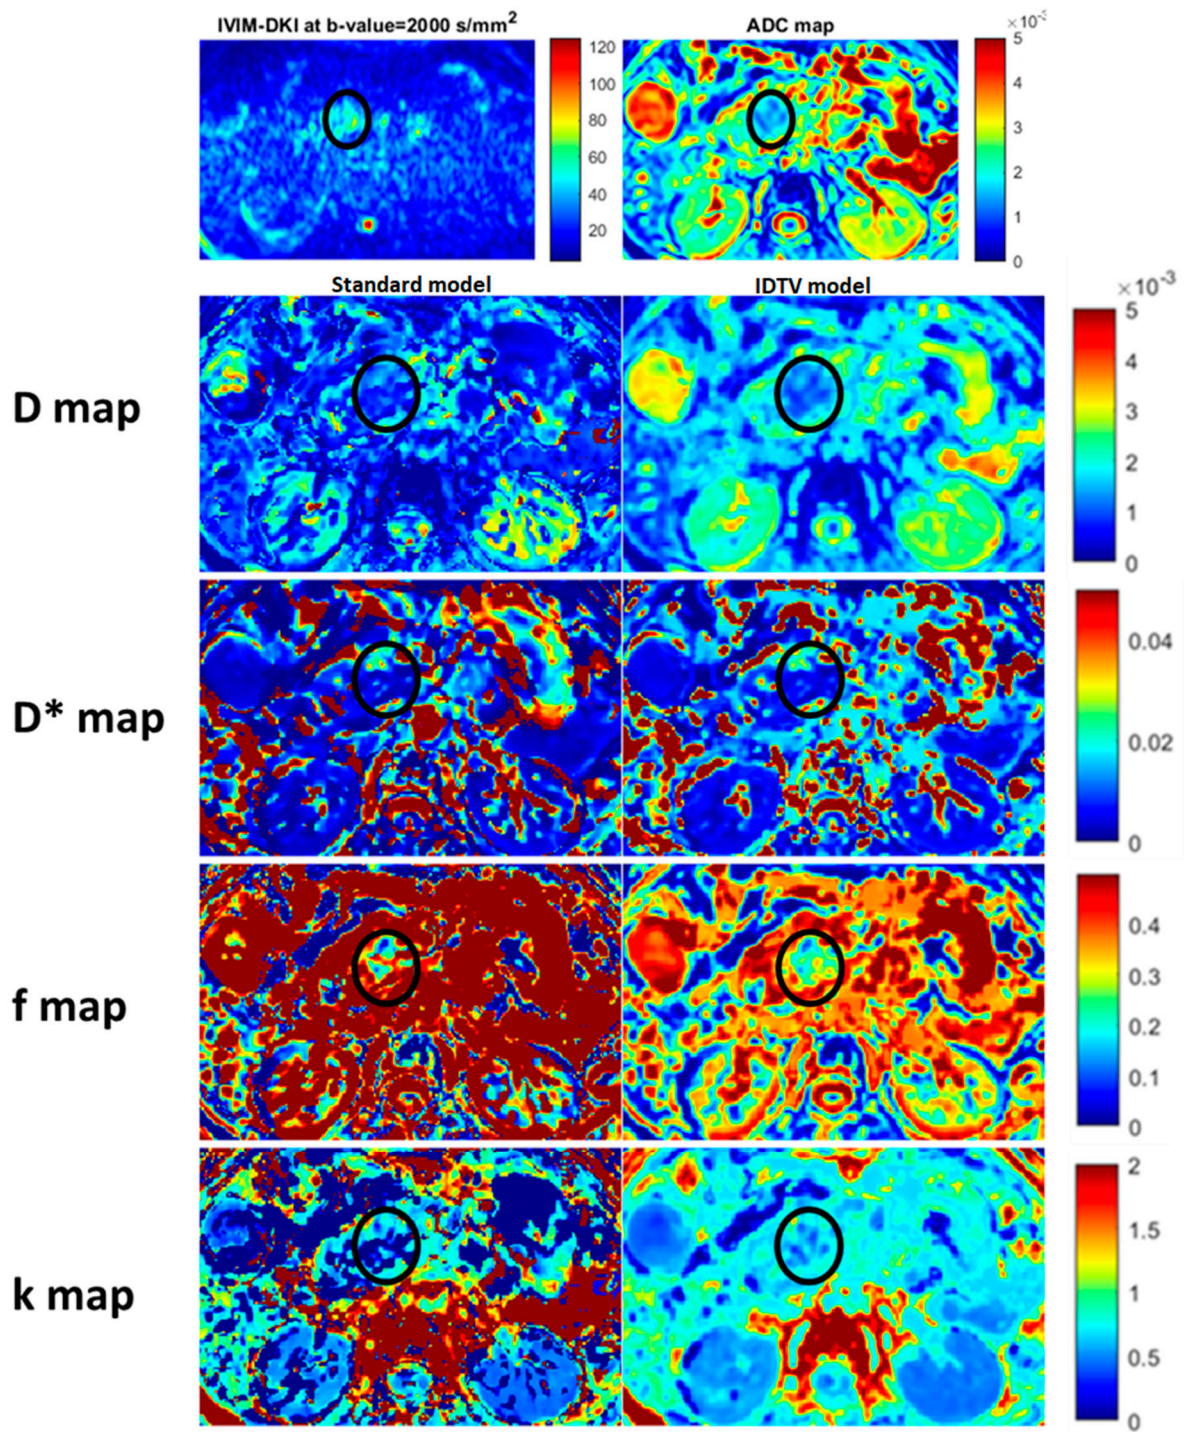

Figure S4: Representative image of a 63-year-old male patient with mass-forming chronic pancreatitis (MFCP); where qualitative comparison between parameter maps (D, D\*, f and k maps) estimated using standard and IDTV model.

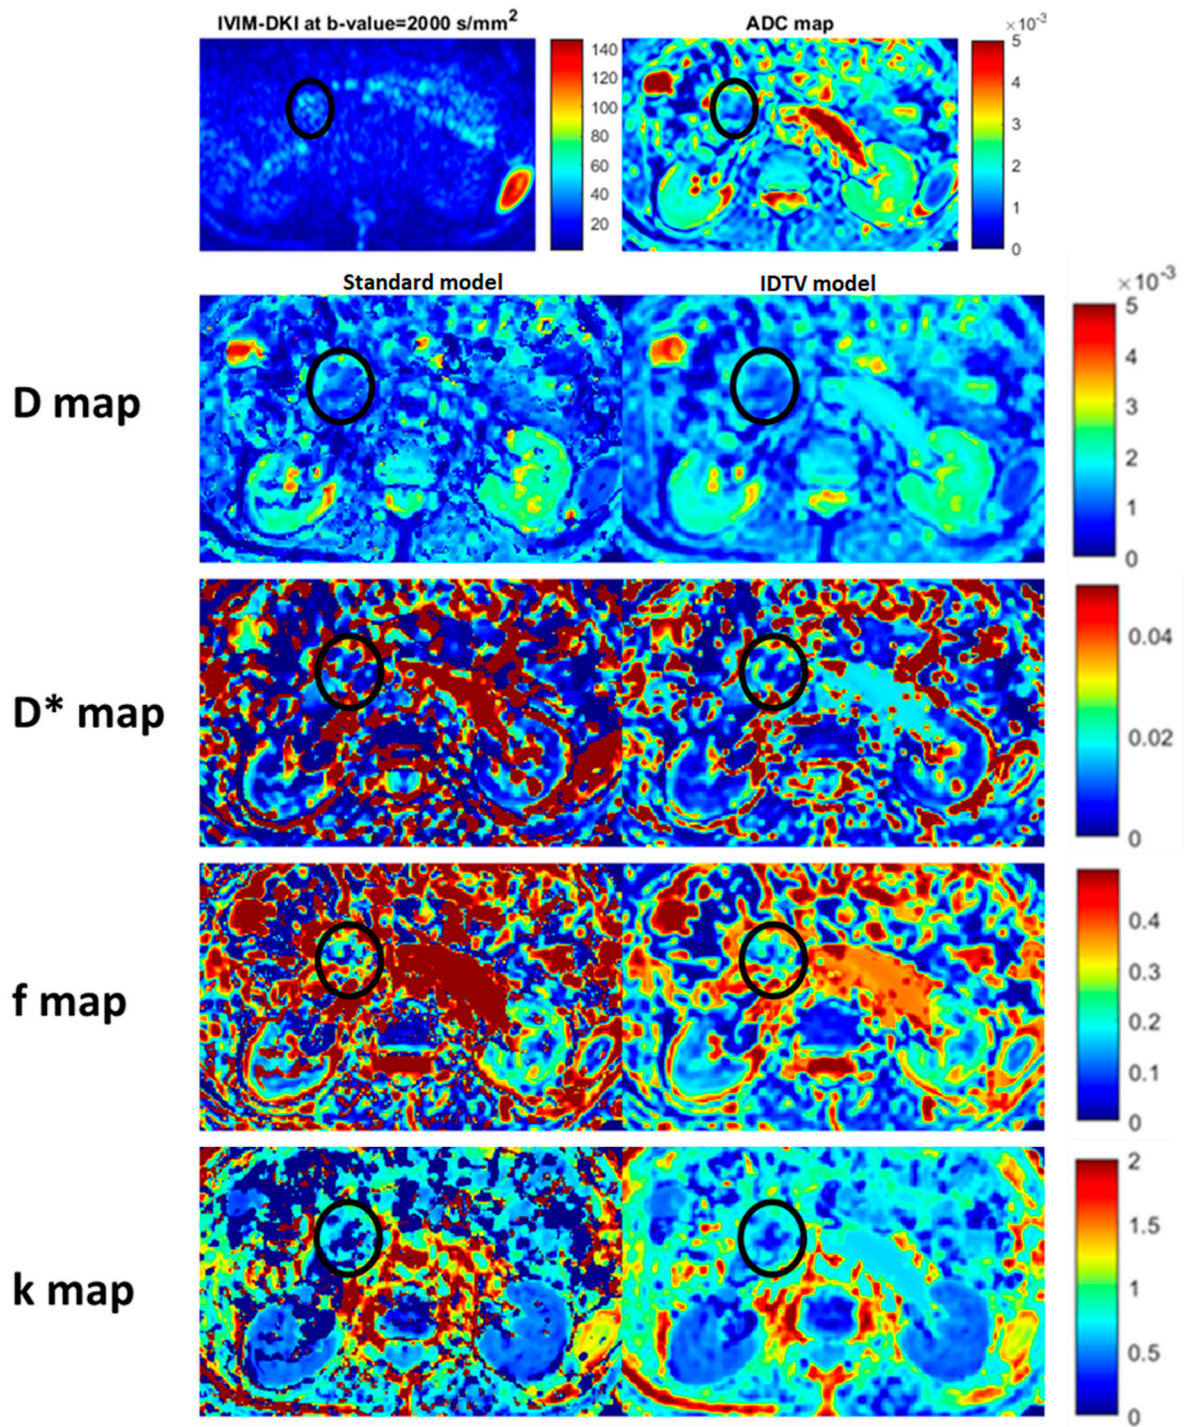

Figure S5: Representative image of a 60–years–old male patient with mass–forming chronic pancreatitis (MFCP); where qualitative comparison between parameter maps (D, D\*, f and k maps) estimated using standard and IDTV model.

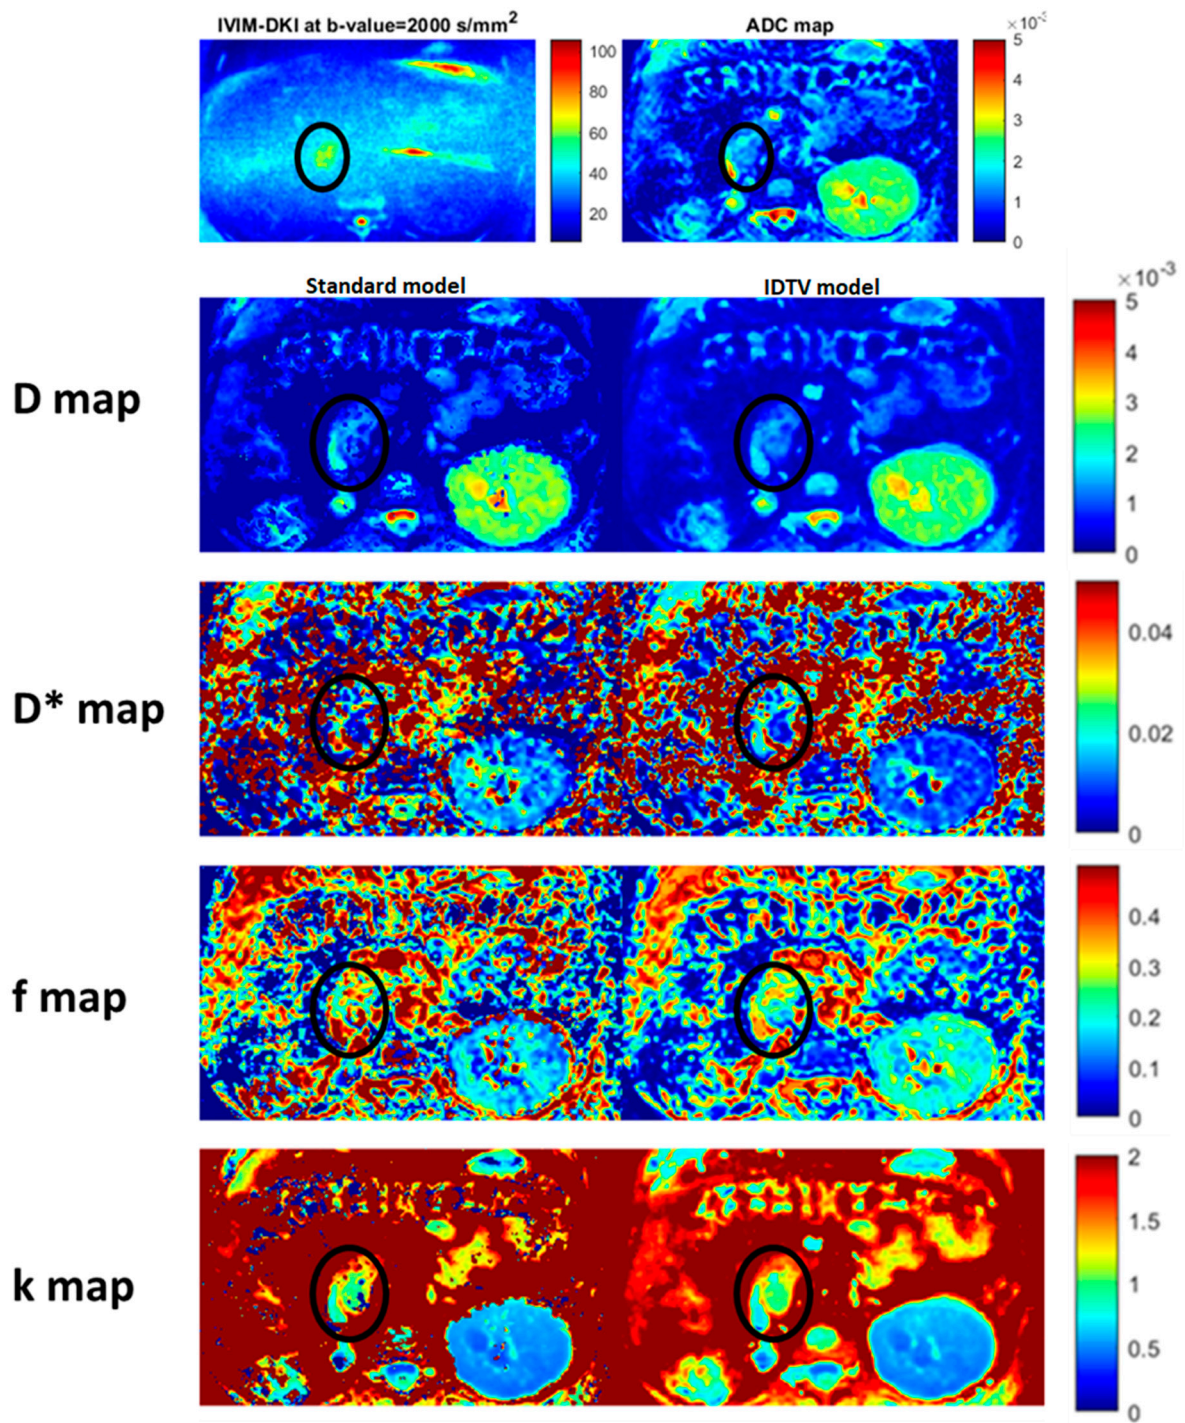

Figure S6: Representative image of a 43-years-old male patient with pancreatic neuroendocrine tumor (PNET); where qualitative comparison between parameter maps (D, D\*, f and k maps) estimated using standard and IDTV model.

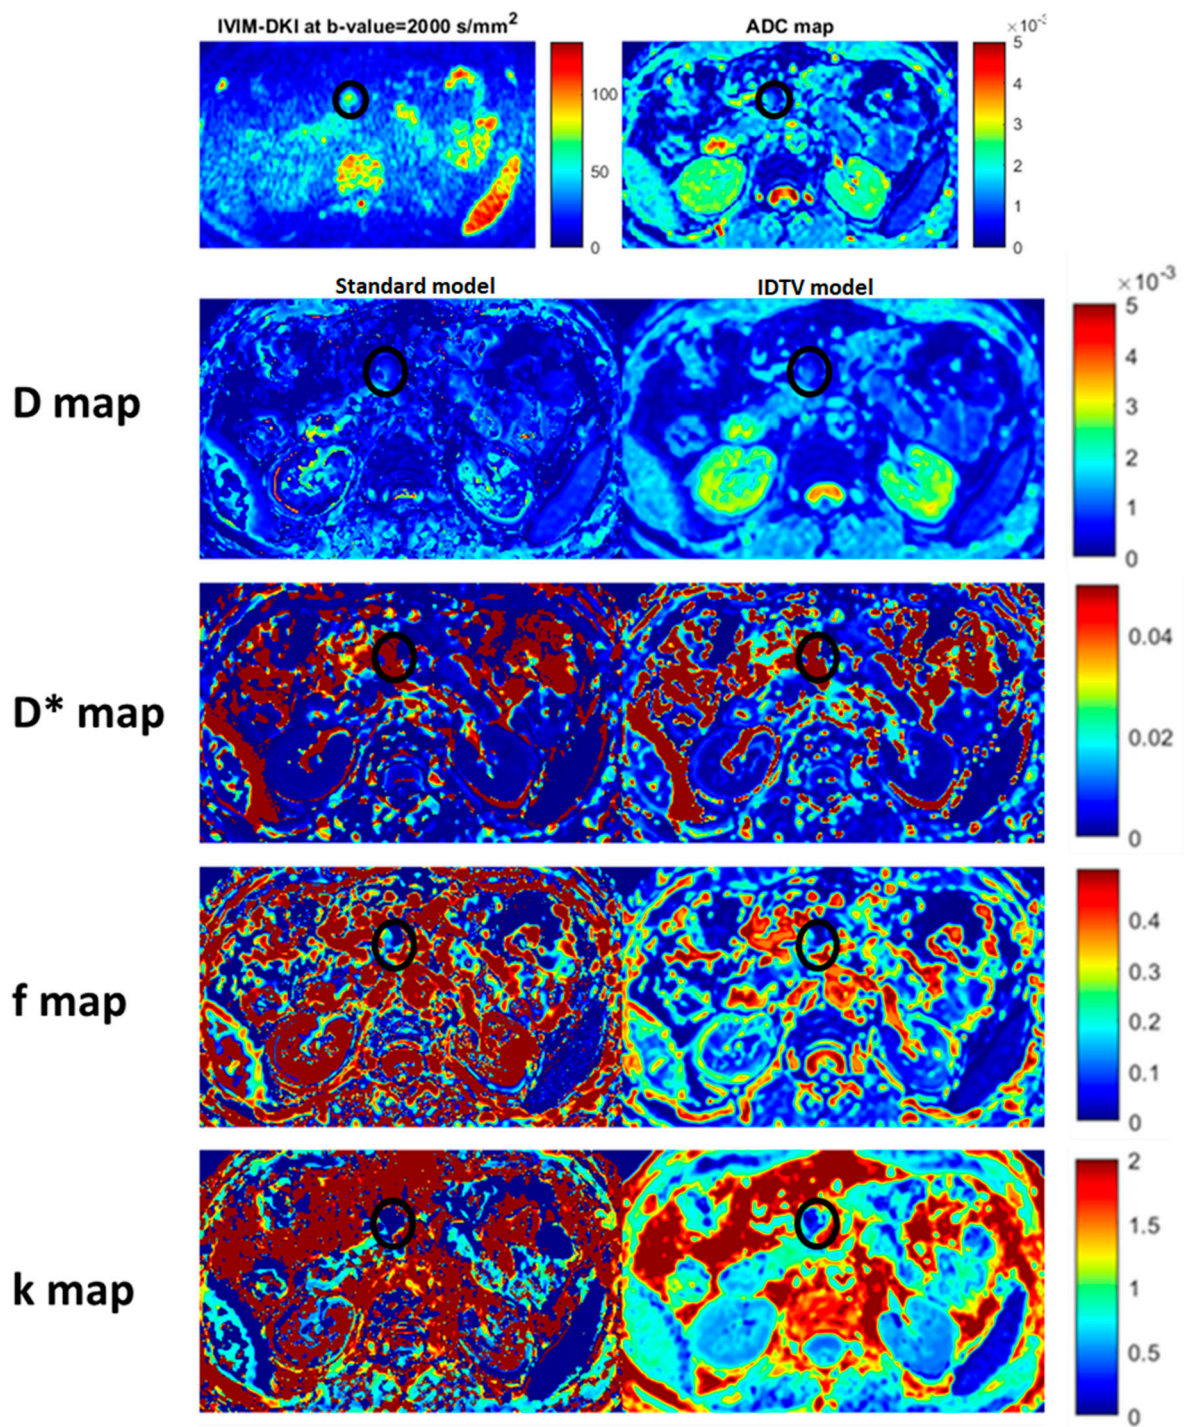

Figure S7: Representative image of a 41–years–old male patient with pancreatic neuroendocrine tumor (PNET); where qualitative comparison between parameter maps (D, D\*, f and k maps) estimated using standard and IDTV model.

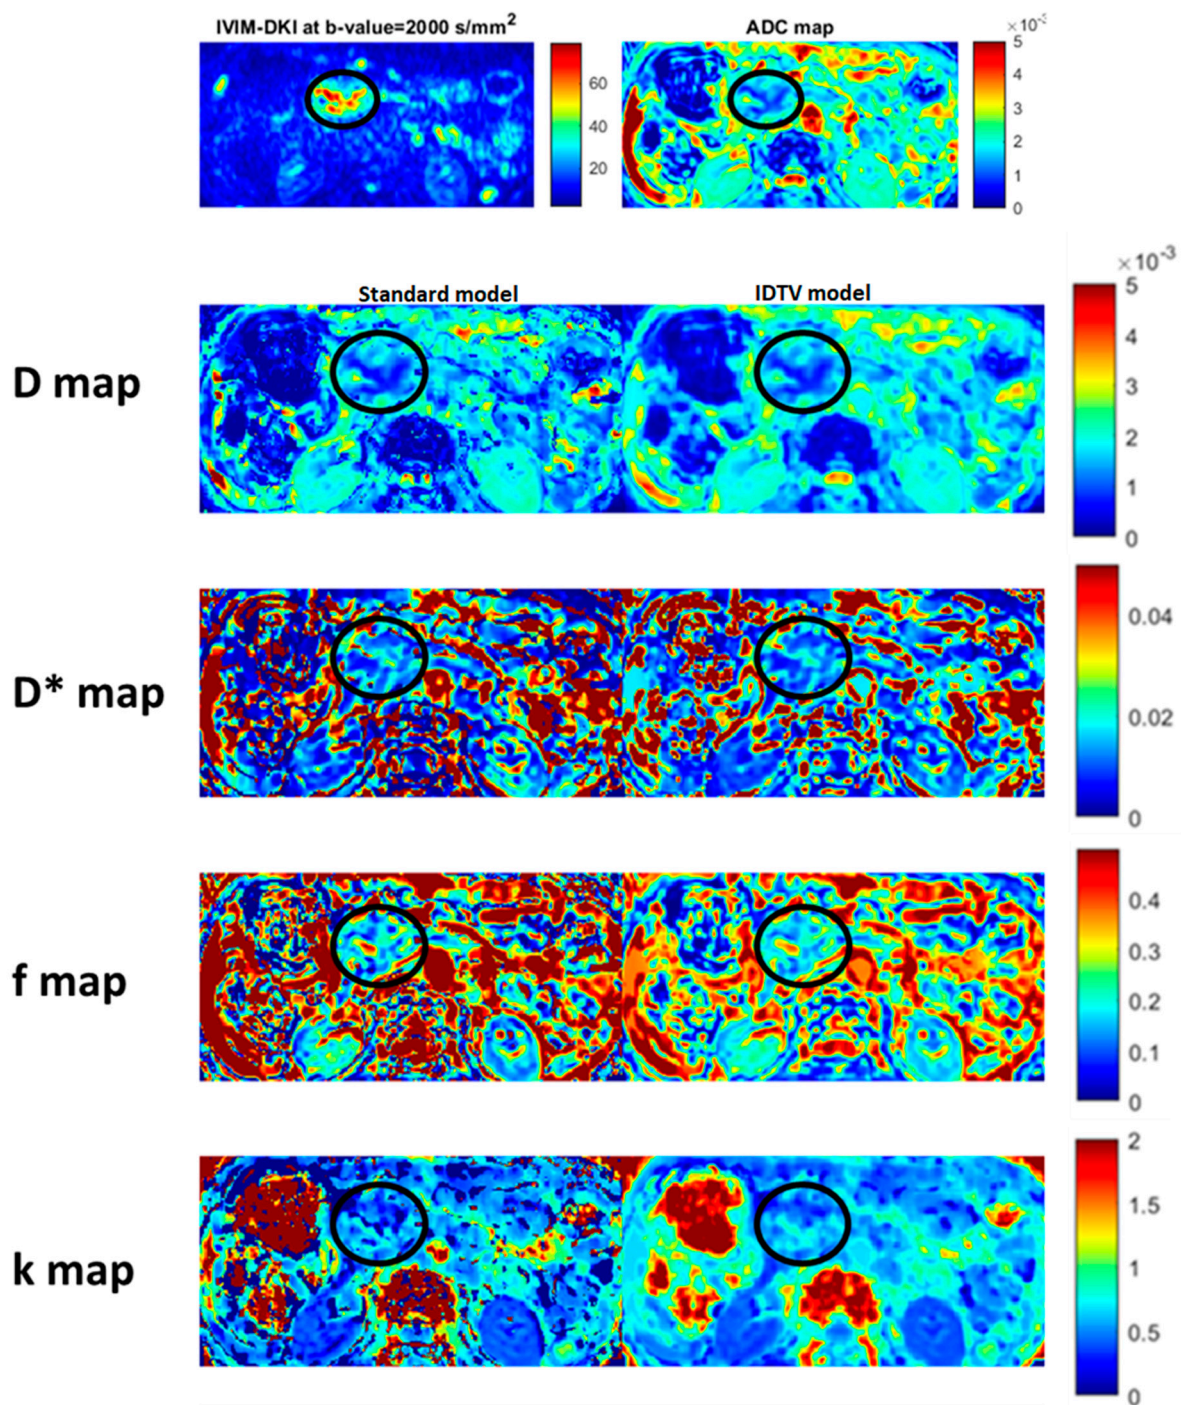

Figure S8: Representative image of a 33-years-old male patient with pancreatic ductal adenocarcinomas (PDAC); where qualitative comparison between parameter maps (D, D\*, f and k maps) estimated using standard and IDTV model.

Table S4: Machine learning–based classification performance of all texture features (30 features) and top ten features selected from ADC, combined and individual IVIM–DKI parameters, and ADC combined with IVIM–DKI parameters to classify PDAC from non–PDAC pancreatic masses using decision tree and ensemble.

| PDAC vs. non–PDAC |                              | Features selected                                                                                                                                     |    | Accuracy % | Precision % | Specificity % | F1 score % | AUC    | Classification Error % |
|-------------------|------------------------------|-------------------------------------------------------------------------------------------------------------------------------------------------------|----|------------|-------------|---------------|------------|--------|------------------------|
| ADC               | All feats (30 features)      | All features                                                                                                                                          | D  | 62.7±3     | 61.6±       | 69.5±2.       | 56.8±      | 0.69±0 | 37.3±1.9               |
|                   |                              |                                                                                                                                                       | T  | .3         | 2           | 8             | 2.8        | .05    |                        |
|                   |                              |                                                                                                                                                       | E  | 90±1.2     | 90±1.       | 91.4±1        | 89.8±      | 0.97±0 | 9.9±1.2                |
|                   | Chi–square (Top 10 features) | f27, f30, f14, f6, f5, f4, f18, f7, f28, f9                                                                                                           | D  | 68.6±2     | 68±1.       | 72.2±1.       | 66.4±      | 0.73±0 | 31.4±1.7               |
|                   |                              |                                                                                                                                                       | T  | .1         | 7           | 8             | 1.9        | .04    |                        |
|                   |                              |                                                                                                                                                       | E  | 90.8±0     | 90.9±       | 92.2±0.       | 90.7±      | 0.97±0 | 9.1±0.8                |
| IVIM–DKI          | All feats (30*4 features)    | All features                                                                                                                                          | D  | 63.7±1     | 62.9±       | 65.5±1.       | 61.4±      | 0.7±0. | 37±1.3                 |
|                   |                              |                                                                                                                                                       | T  | .2         | 1.3         | 1             | 1.8        | .05    |                        |
|                   |                              |                                                                                                                                                       | E  | 89.8±0     | 89.8±       | 91.2±0.       | 89.6±      | 0.96±0 | 10.2±0.9               |
|                   | Chi–square (Top 10 features) | f_parameter_f21,                                                                                                                                      | D  | 74±1.2     | 74.5±       | 77.2±0.       | 73.2±      | 0.8±0. | 25.9±1                 |
|                   |                              |                                                                                                                                                       | T  |            | 1           | 9             | 1.3        | .03    |                        |
|                   |                              | D*_parameter_f29, f_parameter_f13, f_parameter_f16, D*_parameter_f5, f_parameter_f9, f_parameter_f29, k_parameter_f12, k_parameter_f9, D_parameter_f9 | E  | 85.2±0     | 85.2±       | 87±0.7        | 84.9±      | 0.94±0 | 14.8±0.7               |
|                   |                              |                                                                                                                                                       | ns | .7         | 0.8         |               | 0.7        | .02    |                        |
|                   |                              |                                                                                                                                                       |    |            |             |               |            |        |                        |
|                   |                              |                                                                                                                                                       |    |            |             |               |            |        |                        |
|                   |                              |                                                                                                                                                       |    |            |             |               |            |        |                        |
| ADC with IVIM–DKI | All feats (30*5 features)    | All features                                                                                                                                          | D  | 91±0.8     | 91±0.       | 92.4±0.       | 90.8±      | 0.91±0 | 8.9±0.7                |
|                   |                              |                                                                                                                                                       | T  |            | 8           | 5             | 0.7        | .04    |                        |
|                   |                              |                                                                                                                                                       | E  | 84.2±0     | 84.3±       | 86.2±1        | 83.9±      | 0.92±0 | 15.7±0.9               |
|                   | Chi–square (Top 10 features) | f_parameter_f21, D*_parameter_f29, f_parameter_f29                                                                                                    | D  | 74±1.2     | 74.5±       | 77.2±0.       | 73.2±      | 0.8±0. | 25.9±1                 |
|                   |                              |                                                                                                                                                       | T  |            | 1           | 9             | 1.3        | .03    |                        |
|                   |                              |                                                                                                                                                       | E  | 85.2±0     | 85.2±       | 87±0.7        | 84.9±      | 0.94±0 | 14.8±0.7               |

|    |                                            |                                                         | f13,<br>f_parameter_<br>f16,<br>D*_parameter_<br>r_f5,<br>f_parameter_<br>f9,<br>f_parameter_<br>f29,<br>k_parameter_<br>_f12,<br>k_parameter_<br>_f9,<br>D_parameter_<br>_f9 |        |         |         |        |          |          |
|----|--------------------------------------------|---------------------------------------------------------|-------------------------------------------------------------------------------------------------------------------------------------------------------------------------------|--------|---------|---------|--------|----------|----------|
| D  | All<br>feats<br>(30<br>features<br>)       | All features                                            | D                                                                                                                                                                             | 58.7±1 | 56.7±   | 71.8±3. | 47.8±  | 0.56±0   | 41.8±1.5 |
|    |                                            |                                                         | T                                                                                                                                                                             | .9     | 1.5     | 8       | 2.6    | .06      |          |
|    |                                            |                                                         | E                                                                                                                                                                             | 89.8±1 | 89.8±   | 91.4±1. | 89.6±  | 0.96±0   | 10.1±1.6 |
|    | ns                                         | .6                                                      | 1.6                                                                                                                                                                           | 3      | 1.5     | .03     |        |          |          |
|    | Chi-sq<br>uare<br>(Top 10<br>features<br>) | f9, f1, f27,<br>f25, f10, f17,<br>f19, f13, f16,<br>f24 | D                                                                                                                                                                             | 65.4±1 | 64.5±   | 70.2±1. | 61.6±  | 0.72±0   | 34.6±0.8 |
|    |                                            |                                                         | T                                                                                                                                                                             | .6     | 0.9     | 1       | 1.2    | .05      |          |
| E  |                                            |                                                         | 91.8±0                                                                                                                                                                        | 91.8±  | 93±0.8  | 91.6±   | 0.97±0 | 8.2±0.9  |          |
| ns | .9                                         | 0.9                                                     |                                                                                                                                                                               | 0.8    | .02     |         |        |          |          |
| D* | All<br>feats<br>(30<br>features<br>)       | All features                                            | D                                                                                                                                                                             | 62.1±2 | 60.7±   | 71±0.7  | 55±2   | 0.59±0   | 38±0.6   |
|    |                                            |                                                         | T                                                                                                                                                                             | .4     | 0.8     |         |        | .04      |          |
|    |                                            |                                                         | E                                                                                                                                                                             | 75.1±1 | 74.8±   | 77.5±0. | 74±1   | 0.83±0   | 25±0.8   |
|    | ns                                         | .1                                                      | 0.8                                                                                                                                                                           | 7      |         | .05     |        |          |          |
|    | Chi-sq<br>uare<br>(Top 10<br>features<br>) | f29, f5, f22,<br>f27, f26, f25<br>, f30, f11, f2,<br>f1 | D                                                                                                                                                                             | 63.4±1 | 61.8±   | 70.7±2. | 57.2±  | 0.67±0   | 37.1±1.7 |
|    |                                            |                                                         | T                                                                                                                                                                             | .4     | 1.9     | 9       | 3      | .05      |          |
| E  |                                            |                                                         | 69.4±1                                                                                                                                                                        | 68.9±  | 73.3±1. | 67±1.   | 0.78±0 | 30.7±1.2 |          |
| ns | .6                                         | 1.3                                                     | 4                                                                                                                                                                             | 5      | .05     |         |        |          |          |
| f  | All<br>feats<br>(30<br>features<br>)       | All features                                            | D                                                                                                                                                                             | 72.5±3 | 72.3±   | 74.9±2. | 71.2±  | 0.82±0   | 27.9±3.2 |
|    |                                            |                                                         | T                                                                                                                                                                             | .2     | 3       | 9       | 3.3    | .03      |          |
|    |                                            |                                                         | E                                                                                                                                                                             | 77.4±1 | 77.6±   | 79.5±1. | 76.9±  | 0.85±0   | 22.5±1.2 |
|    | ns                                         | .2                                                      | 1.3                                                                                                                                                                           | 1      | 1.2     | .02     |        |          |          |
|    | Chi-sq<br>uare<br>(Top 10<br>features<br>) | f21, f13, f16,<br>f9, f29, f12,<br>f2, f1, f23, f7      | D                                                                                                                                                                             | 70.4±1 | 70.8±   | 73.4±1. | 69.4±  | 0.8±0.   | 29.5±1.8 |
|    |                                            |                                                         | T                                                                                                                                                                             | .9     | 1.8     | 7       | 2      | .03      |          |
| E  |                                            |                                                         | 75.2±3                                                                                                                                                                        | 75.3±  | 77.5±2. | 74.4±   | 0.84±0 | 24.9±3.1 |          |
| ns |                                            | 3.1                                                     | 8                                                                                                                                                                             | 3.3    | .02     |         |        |          |          |
| k  | All<br>feats<br>(30<br>features<br>)       | All features                                            | D                                                                                                                                                                             | 68±2.1 | 67.1±   | 70.6±2. | 65.9±  | 0.72±0   | 32.7±2   |
|    |                                            |                                                         | T                                                                                                                                                                             |        | 2.1     | 8       | 2.3    | .04      |          |
|    |                                            |                                                         | E                                                                                                                                                                             | 76.6±1 | 76.6±   | 78.6±1. | 76±1   | 0.84±0   | 23.4±1.1 |
|    | ns                                         | .1                                                      | 1.1                                                                                                                                                                           | 2      |         | .04     |        |          |          |
|    | Chi-sq<br>uare<br>(Top 10<br>features<br>) | f12, f9, f18,<br>f20, f1, f4,<br>f22, f28, f2,<br>f19   | D                                                                                                                                                                             | 67.9±1 | 67.8±   | 69.8±2. | 66.7±  | 0.74±0   | 32.4±1.7 |
|    |                                            |                                                         | T                                                                                                                                                                             | .5     | 1.8     | 3       | 1.8    | .03      |          |
| E  |                                            |                                                         | 76.5±2                                                                                                                                                                        | 76.7±  | 79±2.1  | 75.9±   | 0.84±0 | 23.5±1.9 |          |
| ns | .1                                         | 1.9                                                     |                                                                                                                                                                               | 2.1    | .03     |         |        |          |          |

---

features

)

---

DT: Decision tree; Ens: Ensemble; PDAC: Pancreatic ductal adenocarcinoma; AUC: Area under curve; ADC: Apparent diffusion coefficient; D: Diffusion coefficient; D\*: Pseudo-diffusion coefficient; f: Perfusion fraction; Kurtosis; IVIM-DKI: Intravoxel Incoherent motion-diffusion kurtosis imaging;

---
